# Supplementary material
Source: publisher site journal article supplement (https://www.dovepress.com/article/216980)
Supplement: Supplementary file 1 [file get_supplementary_file.php]

**Supplementary Material**

**Supplement Table 1** List of participating centers

| **Site Name** |
| --- |
| LKH Graz (Graz, Austria) |
| ZNA Middleheim (Antwerp, Belgium) |
| OLVG-location West (formerly: Sint Lucas Andreas Ziekenhuis) (Amsterdam, The Netherlands) |
| St. Bonifatius Hospital GMbH (Lingen, Germany) |
| Klinikum Augsburg (Augsburg, Germany) |
| Charite-Virchow-Klinikum (Berlin, Germany) |
| University Medical Center Schleswig-Holstein (Kiel, Germany) |
| OLV Ziekenhuis (Aalst, Belgium) |
| Universitätsmedizin Mannheim (Mannheim, Germany) |
| University Hospital Dϋsseldorf (Dϋsseldorf, Germany) |
| Donauisar Klinikum Deggendorf (Deggendorf, Germany) |
| Asklepios Westklinikum Hamburg (Hamburg, Germany) |
| Isala Ziekenhuis (Zwolle, The Netherlands) |
| Medical University Innsbruck (Innsbruck, Austria) |
| A.Z Nikolaas Hospital (St. Nikolaas, Belgium) |
| Haaglansden Medical Center: Antoniushove (Den Haag, The Netherlands) |
| Haaglanden Medical Center: Westeinde (Den Haag, The Netherlands) |
| Kantonsspital Aarau (Aarau, Switzerland) |
| Knappschafts-Krankenhaus Bochum-Langendreer (Bochum, Germany) |
| Centre Hospitalier Régional Universitaire de Lille (CHRU), Hôpital Roger Salengro (Lille, France) |
| Orthopädische Klinik und Poliklinik, Universitätsmedizin Rostock (Rostock, Germany) |

**Supplement Table 2** Main outcomes through 2 years in the unadjusted sample of patients treated with annular closure device

| **Outcome** | **Blinded** | **Unblinded** | ***P*** |
| --- | --- | --- | --- |
| Back pain change a | -38 (-46, -31) | -38 (-41, -35) | 0.89 |
| Leg pain change a | -70 (-77, -63) | -69 (-71, -66) | 0.69 |
| Oswestry Disability Index change a | -49 (-57, -44) | -46 (-48, -44) | 0.29 |
| Symptomatic reherniation b | 5.7% (3.9%) | 11.5% (2.1%) | 0.31 |
| Reoperation b | 8.6% (4.7%) | 9.3% (1.9%) | 0.88 |
| Serious adverse event b,c | 5.7% (3.9%) | 9.5% (1.9%) | 0.47 |

**Note:** aValues indicate change over 2 years (95% CI) with covariate adjustment for baseline value; bValues indicate cumulative event incidence (SE) over 2 years derived from Kaplan-Meier analysis; cAdjudicated as related to the procedure or device.

**Abbreviations:** CI, confidence interval; SE, standard error.
